# Supplementary material for: Magnetic resonance imaging biomarkers of cerebrospinal fluid tracer dynamics in idiopathic normal pressure hydrocephalus
Source: PubMed Central journal article supplement — Brain Commun. 2020 Nov 6;2(2):fcaa187. doi: 10.1093/braincomms/fcaa187 (PMC7753057; doi:10.1093/braincomms/fcaa187), 2020-11-06
Supplement: fcaa187_supplementary_data.pdf [file fcaa187_supplementary_data.pdf]

# Supplementary material

## Imaging biomarkers of cerebrospinal fluid tracer dynamics in idiopathic normal pressure hydrocephalus

**Per Kristiam Eide, MD, PhD<sup>1,2</sup>, Are H Pripp, PhD<sup>3</sup>, Geir Ringstad, MD, PhD<sup>4</sup>**

*<sup>1</sup>Department of Neurosurgery, Oslo University Hospital-Rikshospitalet, Oslo, Norway*

*<sup>2</sup>Institute of Clinical Medicine, Faculty of Medicine, University of Oslo, Oslo, Norway,*

*<sup>3</sup>Oslo Centre of Biostatistics and Epidemiology, Oslo University Hospital, Oslo, Norway,*

*<sup>4</sup>Department. of Radiology, Oslo University Hospital- Rikshospitalet, Oslo, Norway.*

### **Corresponding author:**

Professor Per Kristian Eide, MD PhD

Dept. of Neurosurgery,

Oslo University Hospital – Rikshospitalet,

PB 4950 Nydalen, 0424 OSLO, Norway

Phone: +47 91649419

Fax: +47-23074310

E-mail: [p.k.eide@medisin.uio.no](mailto:p.k.eide@medisin.uio.no)

**Supplementary Table 1. MRI biomarkers at individual level**

| Patient     | MRI biomarkers of CSF space anatomy |                |      | MRI biomarkers of CSF tracer dynamics |                       |                       |                       |                       | MRI biomarkers of neurodegeneration |               |               | Pulsatile ICP |
|-------------|-------------------------------------|----------------|------|---------------------------------------|-----------------------|-----------------------|-----------------------|-----------------------|-------------------------------------|---------------|---------------|---------------|
|             | Evans index                         | Callosal angel | DESH | Ventricular Reflux Grade              | 1-night clearance CSF | 2-night clearance CSF | 1-night clearance ERC | 2-night clearance ERC | MTA Score                           | Fazekas score | ERC thickness | MWA           |
| <b>iNPH</b> |                                     |                |      |                                       |                       |                       |                       |                       |                                     |               |               |               |
| <b>1</b>    | 0.39                                | 71             | 0    | 4                                     | -48                   |                       | -28                   |                       | 2                                   | 2             | 1.5           | 7.6           |
| <b>2</b>    | 0.36                                | 144            | 0    | 1                                     | -47                   |                       | 8                     |                       | 1                                   | 1             | 1.7           | 5.4           |
| <b>3</b>    | 0.39                                | 38             | 1    | 4                                     | -41                   |                       | -15                   |                       | 2                                   | 2             | 2.1           | 8.7           |
| <b>4</b>    | 0.43                                | 44             | 1    | 4                                     | -44                   |                       | -22                   |                       | 3                                   | 1             | 2.2           | 4.6           |
| <b>5</b>    | 0.37                                | 54             | 1    | 3                                     | -48                   |                       | -27                   |                       | 2                                   | 2             | 2.1           | 6.5           |
| <b>6</b>    | 0.36                                | 95             | 0    | 4                                     | -23                   |                       | 8                     |                       | 2                                   | 2             | 1.9           | 4.0           |
| <b>7</b>    | 0.39                                | 59             | 1    | 3                                     | 12                    |                       | 49                    |                       | 2                                   | 3             | 2.1           | 5.6           |
| <b>8</b>    | 0.34                                | 77             | 1    | 1                                     | -74                   |                       | 24                    |                       | 2                                   | 2             | 2.2           | 3.8           |
| <b>9</b>    | 0.36                                | 50             | 1    | 3                                     | -24                   |                       | 28                    |                       | 2                                   | 3             | 2.1           | 4.6           |
| <b>10</b>   | 0.32                                | 78             | 1    | 3                                     | -59                   |                       | -28                   |                       | 2                                   | 3             | 2.4           | 7.0           |
| <b>11</b>   | 0.45                                | 88             | 0    | 4                                     |                       |                       |                       |                       | 2                                   | 3             |               | 6.5           |
| <b>12</b>   | 0.39                                | 39             | 1    | 3                                     | -42                   |                       | -11                   |                       | 2                                   | 2             | 2.4           | 9.4           |
| <b>13</b>   | 0.37                                | 54             | 1    | 4                                     | -39                   |                       | -15                   |                       | 2                                   | 1             | 1.8           |               |
| <b>14</b>   | 0.41                                | 66             | 1    | 4                                     | -12                   |                       | 40                    |                       | 2                                   | 1             | 2.1           | 6.1           |
| <b>15</b>   | 0.39                                | 82             | 0    | 4                                     | -30                   |                       | 4                     |                       | 2                                   | 2             | 1.8           | 5.8           |
| <b>16</b>   | 0.42                                | 48             | 0    | 4                                     | -1                    |                       | 16                    |                       | 2                                   | 1             | 1.8           | 5.5           |
| <b>17</b>   | 0.32                                | 58             | 1    | 4                                     | -46                   |                       | -2                    |                       | 2                                   | 3             | 1.8           | 4.9           |
| <b>18</b>   | 0.38                                | 50             | 0    | 4                                     | -61                   | -92                   | 11                    | -31                   | 2                                   | 1             | 2.0           | 9.7           |
| <b>19</b>   | 0.39                                | 73             | 1    | 4                                     | -80                   | -92                   | -8                    | -43                   | 3                                   | 3             | 1.8           | 6.8           |
| <b>20</b>   | 0.34                                | 80             | 1    | 4                                     | -23                   | -66                   | -22                   | -48                   | 2                                   | 3             | 2.1           | 4.6           |
| <b>21</b>   | 0.42                                | 82             | 0    | 4                                     | -33                   |                       | 3                     |                       | 3                                   | 2             | 1.7           | 6.7           |
| <b>22</b>   | 0.45                                | 68             | 0    | 4                                     | -26                   |                       | 6                     |                       | 3                                   | 0             | 2.2           | 5.4           |
| <b>23</b>   | 0.36                                | 77             | 0    | 4                                     | -67                   |                       | -11                   |                       | 2                                   | 3             | 1.8           | 5.4           |
| <b>24</b>   | 0.38                                | 65             | 0    | 3                                     | -47                   |                       | -30                   |                       | 2                                   | 0             | 1.9           | 5.8           |
| <b>25</b>   | 0.44                                | 72             | 0    | 4                                     | -77                   | -90                   | -37                   | -53                   | 2                                   | 1             | 2.4           | 4.9           |

|                        |                                                |                           |             |                                              |                                      |                                      |                                      |                                      |                                                |                          |                          |                          |                  |
|------------------------|------------------------------------------------|---------------------------|-------------|----------------------------------------------|--------------------------------------|--------------------------------------|--------------------------------------|--------------------------------------|------------------------------------------------|--------------------------|--------------------------|--------------------------|------------------|
| <b>26</b>              | 0.38                                           | 58                        | 0           | 4                                            | -50                                  |                                      |                                      | -38                                  |                                                | 3                        | 1                        | 1.5                      | 4.4              |
| <b>27</b>              | 0.38                                           | 113                       | 0           | 3                                            | -29                                  | -66                                  |                                      | -3                                   | -32                                            | 1                        | 2                        | 1.7                      | 4.1              |
| <b>28</b>              | 0.45                                           | 51                        | 1           | 3                                            | -46                                  |                                      |                                      | -33                                  |                                                | 2                        | 2                        | 2.0                      | 4.4              |
| <b>29</b>              | 0.42                                           | 39                        | 0           | 4                                            | -30                                  | -59                                  |                                      | 1                                    | -8                                             | 2                        | 1                        | 1.0                      | 6.9              |
| <b>30</b>              | 0.41                                           | 73                        | 1           | 4                                            | -53                                  | -83                                  |                                      | -44                                  | -62                                            | 3                        | 2                        | 1.0                      | 11.2             |
| <b>31</b>              | 0.38                                           | 86                        | 0           | 3                                            | -53                                  | -83                                  |                                      | -25                                  | -42                                            | 2                        | 1                        | 2.4                      | 4.0              |
| <b>32</b>              | 0.44                                           | 89                        | 0           | 4                                            | -49                                  | -81                                  |                                      | -14                                  | -38                                            | 2                        | 2                        | 1.9                      | 4.5              |
| <b>33</b>              | 0.29                                           | 127                       | 0           | 2                                            | -32                                  | -72                                  |                                      | -20                                  | -43                                            | 2                        | 0                        | 2.0                      | 4.1              |
| <b>34</b>              | 0.56                                           | 55                        | 0           | 4                                            | -45                                  | -70                                  |                                      | 7                                    | -8                                             | 2                        | 1                        | 2.3                      | 4.2              |
| <b>AVG ±<br/>STDEV</b> | <b>0.39 ±<br/>0.05</b>                         | <b>70.7 ±<br/>24.1</b>    |             |                                              | <b>-41 ± 20</b>                      | <b>-78 ± 12</b>                      |                                      | <b>-7 ± 23</b>                       | <b>-37 ± 17</b>                                |                          |                          | <b>1.9 ± 0.3</b>         | <b>5.9 ± 1.8</b> |
|                        |                                                |                           |             |                                              |                                      |                                      |                                      |                                      |                                                |                          |                          |                          |                  |
|                        | <b>MRI biomarkers of CSF<br/>space anatomy</b> |                           |             | <b>MRI biomarkers of CSF tracer dynamics</b> |                                      |                                      |                                      |                                      | <b>MRI biomarkers of<br/>neurodegeneration</b> |                          |                          | <b>Pulsatile<br/>ICP</b> |                  |
| <b>Patient</b>         | <b>Evans<br/>index</b>                         | <b>Callosal<br/>angel</b> | <b>DESH</b> | <b>Ventricular<br/>Reflux<br/>Grade</b>      | <b>1-night<br/>clearance<br/>CSF</b> | <b>2-night<br/>clearance<br/>CSF</b> | <b>1-night<br/>clearance<br/>ERC</b> | <b>2-night<br/>clearance<br/>ERC</b> | <b>MTA<br/>Score</b>                           | <b>Fazekas<br/>score</b> | <b>ERC<br/>thickness</b> | <b>MWA</b>               |                  |
| <b>REF</b>             |                                                |                           |             |                                              |                                      |                                      |                                      |                                      |                                                |                          |                          |                          |                  |
| <b>1</b>               | 0.24                                           | 120                       | 0           | 0                                            | -91                                  |                                      | -54                                  |                                      | 0                                              | 1                        | 2.7                      |                          |                  |
| <b>2</b>               | 0.27                                           | 126                       | 0           | 2                                            | -80                                  | -95                                  | -59                                  | -70                                  | 0                                              | 0                        | 2.3                      |                          | 2.9              |
| <b>3</b>               | 0.20                                           | 123                       | 0           | 0                                            | -86                                  | -96                                  | -8                                   | -37                                  | 0                                              | 0                        | 2.1                      |                          |                  |
| <b>4</b>               | 0.31                                           | 133                       | 0           | 0                                            | -43                                  | -79                                  | 27                                   | -12                                  | 0                                              | 0                        | 2.5                      |                          | 2.6              |
| <b>5</b>               | 0.26                                           | 97                        | 0           | 2                                            | -81                                  | -96                                  | -48                                  | -57                                  | 0                                              | 1                        | 2.2                      |                          |                  |
| <b>6</b>               | 0.26                                           | 125                       | 0           | 0                                            | -58                                  | -92                                  | -25                                  | -56                                  | 0                                              | 0                        | 2.6                      |                          |                  |
| <b>7</b>               | 0.31                                           | 106                       | 0           | 1                                            | -71                                  | -95                                  | -36                                  | -58                                  | 0                                              | 1                        | 2.6                      |                          |                  |
| <b>8</b>               | 0.24                                           | 115                       | 0           | 0                                            | -70                                  | -94                                  | -59                                  | -69                                  | 1                                              | 0                        | 1.8                      |                          |                  |
| <b>9</b>               | 0.28                                           | 104                       | 0           | 1                                            | -61                                  | -92                                  | -45                                  | -62                                  | 1                                              | 0                        | 1.9                      |                          | 3.9              |
| <b>10</b>              | 0.25                                           | 112                       | 0           | 2                                            | -70                                  | -92                                  | -50                                  | -61                                  | 0                                              | 0                        | 2.2                      |                          | 2.2              |
| <b>11</b>              | 0.28                                           | 104                       | 0           | 1                                            | -70                                  | -94                                  | -33                                  | -49                                  | 0                                              | 0                        | 2.4                      |                          |                  |
| <b>12</b>              | 0.27                                           | 103                       | 0           | 0                                            | -69                                  | -97                                  | -53                                  | -64                                  | 0                                              | 0                        | 2.3                      |                          | 3.5              |
| <b>13</b>              | 0.24                                           | 106                       | 0           | 3                                            | -68                                  | -94                                  | -41                                  | -63                                  | 0                                              | 0                        | 2.6                      |                          |                  |
| <b>14</b>              | 0.33                                           | 135                       | 0           | 1                                            | -53                                  | -86                                  | 1                                    | -17                                  |                                                | 0                        | 2.0                      |                          |                  |

|              |               |                |   |   |                 |                |                 |                 |   |   |                  |                  |
|--------------|---------------|----------------|---|---|-----------------|----------------|-----------------|-----------------|---|---|------------------|------------------|
| <b>15</b>    | 0.29          | 132            | 0 | 2 | -86             | -94            | -25             | -37             | 2 | 2 | 2.4              |                  |
| <b>16</b>    | 0.25          | 105            | 0 | 3 | -51             | -87            | -16             | -43             | 1 | 1 | 2.3              |                  |
| <b>17</b>    | 0.22          | 107            | 0 | 2 | -58             | -87            | -9              | -26             | 1 | 0 | 1.9              |                  |
| <b>AVG ±</b> | <b>0.26 ±</b> | <b>114.9 ±</b> |   |   |                 |                |                 |                 |   |   |                  |                  |
| <b>STDEV</b> | <b>0.03</b>   | <b>12.2</b>    |   |   | <b>-69 ± 13</b> | <b>-92 ± 5</b> | <b>-31 ± 24</b> | <b>-49 ± 18</b> |   |   | <b>2.3 ± 0.3</b> | <b>3.0 ± 0.7</b> |
